# Supplementary material for: A short scale for measuring attitudes towards the doctor-patient relationship: psychometric properties and measurement invariance of the German Patient-Practitioner-Orientation Scale (PPOS-D6)
Source: PeerJ. 2021 Dec 8;9:e12604. doi: 10.7717/peerj.12604 (PMC8667738; doi:10.7717/peerj.12604)
Supplement: Supplemental Information 3 [file peerj-09-12604-s003.xlsx]

## Sheet: PPOS-D6 raw dataset2
ID	v1.1	v1.2	v1.3	v1.4	v1.5	v1.6	v2	v2b	v3	v4	v4b	v5	v6.1	v6.2	v6.3	v6.4	v6.5	v6.6	v6.7	v6.8	v6.9	v6.10	v6.11	v6.12	v6.13	v6.14	v6.15	v7	v8
dg1	4	2	1	0	1	2	1	OTA	1	0		1991	4	4	3	1	4	1	3	2	3	1	4	4	2	4	4	Fixierung von Dementen, alkoholisierten, unter Drogen stehenden Patienten
dg10	2	3	2	0	4	4	0		1	0		1999	4	4	3	0	5	1	1	1	4	2	3	4	1	1	4
dg11	3	0	2	0	-99	5	0		1	1		1756	5	5	3	2	1	2	3	-99	-99	2	0	-99	-99	-99	-99	Isolierung, Psycheatisch
dg12	3	4	1	2	1	4	0		1	1		1999	4	4	2	2	3	0	2	2	3	2	2	2	3	2	4	/	/
dg13	3	3	1	0	1	3	0		1	0		2000	2	2	4	1	3	0	2	3	3	2	3	2	2	4	5
dg14	4	2	0	0	1	4	1	Pflegepraktikum	1	0		2000	4	4	2	2	3	1	1	1	3	3	4	3	2	4	3	Fixierung, Medikamentenverabreichung (Beruhigungsmittel)
dg15	3	4	3	2	1	3	1	Praktika	1	1		1999	4	4	2	3	4	2	3	4	3	1	4	2	2	2	3	Fesseln eines Patienten an den Stuhl; zwingen, dass er Medikamente nimmt.	/
dg16	4	3	1	1	2	4	1	Pflegepraktikum	1	1		2000	4	4	3	2	4	2	4	3	4	3	4	3	2	2	4	z.B. das Einnehmen von Medikamenten bei Dementen Patienten
dg17	3	3	1	1	2	2	0		1	0		2000	4	3	3	3	2	1	2	3	2	2	4	2	2	1	4
dg18	1	1	1	1	2	2	0		1	0		2000	3	4	5	3	4	2	3	3	4	2	1	1	2	2	5	Drogenproblem, Magersucht, psychische Probleme	Ich denke Zwang ist etwas, was sich sehr negativ auf den Patienten auswirken kann und sollte deswegen nur im Notfall angewandt werden -> lieber ausführliches Gespräch
dg19	3	4	0	0	1	3	0		1	0		2000	4	4	4	2	3	0	1	0	3	3	3	1	2	-99	5	Zwangsernährung bei Magersucht, Zwangseinweisung, rechtlich angeordnete Entzugsmaßnahmen
dg2	4	3	2	0	2	3	1	MTLA-Ausbildung	1	0		1992	3	3	5	3	0	0	1	5	1	2	3	1	2	3	5
dg20	1	0	1	0	0	3	1	Pflegepraktikum	1	0		2001	4	4	3	3	2	0	3	3	3	2	4	3	-99	3	4	Das Thema "Zwang i.d. Medizin" verbinde ich mit dem Fixieren von Pat. und der Zwangseinweisung in psychiatrischen Einrichtungen.
dg21	5	4	1	1	1	1	1	Pflegepraktikum 3 Monate	1	0		1999	1	2	4	0	1	0	0	4	2	2	3	2	3	4	4	Fixierung, Zwangsernährung, ungewollte Körperpflege, z.T. Medikamentengabe bei Demenzpatienten
dg22	3	3	2	0	0	2	1	Praktikum	1	0		1999	4	4	3	2	3	1	3	3	3	3	4	2	3	5	4	Fixierung im Krankenbett, Zwangsernährung
dg23	4	3	1	0	1	1	1	FSJ	1	0		1999	3	2	3	1	3	0	4	4	1	1	0	0	3	4	5	Fixierung, Zwangsernährung
dg24	-99	3	1	2	3	1	1	Pflegepraktikum	1	1		1999	4	4	4	2	3	1	3	3	2	1	-99	2	3	4	4	Fixierung, Sedierung gegen WIllen, künstl. Ernährung
dg25	1	0	0	0	0	0	1	Ausbildung	1	0		1990	1	4	4	2	2	0	1	4	3	2	0	1	4	4	5	Fixierung, Füttern bei Verweigerung
dg26	3	2	1	0	0	2	1	Kinderkrankenschwester	1	0		1991	3	3	4	0	4	0	2	2	3	3	3	2	2	2	3	Druck aufbauen, dass Therapien durchgeführt werden z.B. Medikamenteneinnahme, max. Zwangsmaßnahme: Fixierung
dg27	3	0	3	0	0	2	1	Ausbildung	1	1		1991	5	5	5	0	5	1	4	4	0	1	4	1	2	0	0	PsychKG/ Unterbringung BGB	/
dg28	3	4	1	0	0	4	1	Notfallsanitäter	1	1		1991	5	5	4	3	4	1	1	2	0	3	5	1	1	4	4	Fixierung, Sedierung
dg29	3	2	1	0	0	2	1	Ehrenamt + Rettungsdienst	1	0		1999	3	3	4	1	3	1	1	3	1	1	2	2	2	-99	4	Zwang zur Medikamenteneinnahme durch vehementes Einreden auf Pat.
dg3	3	4	1	1	2	5	1	Pflegepraktikum	1	1		2000	5	4	4	1	3	0	2	3	2	1	4	2	2	4	5	Fixierung, therapeutische Maßnahmen gegen Patientenwillen	Der persönliche Kontakt zwischen Arzt & Patient ist sehr wichtig
dg30	3	4	2	1	2	3	0		1	0		1998	4	4	4	2	3	0	1	4	-99	1	3	0	2	1	4
dg31	5	4	5	0	1	2	0		1	0		1998	4	2	4	-99	1	1	3	4	4	3	4	3	3	2	4	Einreichen des Medikamentes ohne freien Willen des Patienten
dg32	1	2	1	1	2	-99	1	Praktika	1	0		1999	3	3	4	2	3	2	1	3	2	1	4	2	-99	-99	4	Fixierung
dg33	3	2	2	2	1	3	1	Krankenpfleger	1	1		1988	4	4	3	2	4	1	2	3	2	1	4	1	2	3	3	Fixierung (3-Punkt, 5-Punkt) / Unterbringung geschl. Psychiatrie (gegen Willen); Bettgitter / Verabreichung von Medikation gegen Patientenwillen	/
dg34	4	3	5	1	1	4	0		1	0		1999	4	3	5	1	4	1	3	5	3	2	2	1	2	2	5	Pflicht. Nachrungsaufnahme
dg35	3	2	1	1	1	3	1	Pflegepraktikum	1	0		1999	3	3	3	2	3	2	3	3	3	3	3	2	3	3	4
dg36	3	2	0	0	0	5	0		1	0		1998	3	5	4	2	4	0	4	5	3	1	4	2	3	2	5	Die Maßnahmen, die oft in den Krankenhäusern für psychisch gestörte Menschen angewendet werden	nein
dg37	3	2	1	0	2	3	0		1	0		1969	4	3	4	2	1	0	2	5	4	1	5	2	1	3	5	Fixierung, Einweisung in eine geschlossene Abteilung
dg38	4	2	0	0	2	3	0		1	0		1979	2	3	3	3	3	0	1	4	2	2	3	1	2	3	5	Fixierung
dg4	4	3	1	0	2	3	0		1	0		2000	1	2	4	2	2	1	1	4	3	3	4	1	-99	2	4	Fixierung
dg5	2	2	1	0	1	1	1	FSJ	1	0		1999	4	4	3	2	4	1	3	3	4	2	2	2	2	4	4	Fixierungsmaßnahmen, Ernährungssonden (Zwangsernährung), in bestimmten Fällen Sedierung
dg6	4	2	0	0	1	0	1	Praktika	1	0		1999	4	4	4	2	3	1	1	2	3	0	3	1	2	3	4	Fixierungen im Patientenbett
dg7	3	5	2	1	2	3	0		1	0		1999	4	4	3	2	3	1	4	3	3	3	5	1	2	2	4	Zwangseinweisung (Psychiatrie)	/
dg8	3	5	2	1	2	2	0		1	0		1999	5	4	3	2	3	2	3	4	4	3	5	4	3	4	4	Zwangsjacken	/
dg9	2	3	2	0	3	3	1	nur wenige Tage Ärzte begleitet im Rahmen des "Jobdiscovery-Day"	1	1		1998	5	5	3	1	5	2	1	3	2	3	4	4	1	1	4	depressive Patienten denen aus ihrer momentanen Lage heraus alles egal ist und anders psychisch erkrankte, die nicht in der Lage zu sind erkennen, dass man ihnen helfen möchte, sollten gegen ihren Willen für sie wichtige Medikamente eingeflößt bekommen. (über Medikamente lügen oder Familie, Pflege miteinbeziehen um bspw. Medikamente in Essen untermischen.) aber auch verschreiben von Medikamenten …	Beim überlegen über meine Antwort von Frage 7 ist mir jedoch klar geworden, dass dies quasi nicht möglich ist ohne das Vertrauen zum Patienten komplett zu verlieren oder seine Menschenwürde zu verletzen. Außerdem denke ich, dass "heimliche" Zwangsmaßnahmen bei psychisch nicht [...] behinderten Menschen [...] schwierig durchzuführen sind.
ds1	3	0	1	3	1	2	0		1	1		1998	3	3	3	3	3	3	3	1	3	3	3	1	0	3	4	/	/
ds10	1	3	0	0	1	4	1	Ausbildung / Studium	1	0		1990	2	3	4	2	3	0	1	4	1	0	3	0	1	3	3	Fixierung, Ernäherung	/
ds11	1	1	1	0	0	0	1	Ausbildung zum Rettungsassistent - Notfallsanitäter	1	1		1991	3	4	4	1	4	0	1	5	4	3	4	2	3	4	5	Zwangsmedikationen, Missachtung von Patientenverfügungen in Pflegeeinrichtungen, Zwangseinweisung, Zwangsimmobilisation etc	Zwar nicht zum Zwang, aber in der Klinik sollte die Kommunikation zwischen Berufsgruppen mehr auf Augenhöhe / teamebene stattfinden
ds12	2	4	3	0	1	4	0		1	0		1999	3	4	3	1	3	0	1	4	3	0	1	0	-99	2	3	Zwangsernährung, Fixieren von Patienten, Ruhigstellung durch Medikamente	ungenügende Aufklärung über Maßnahmen und deren Alternativen können bei (leichtgläubigen) Menschen auch eine Art Zwang bewirken (Manipulation dieser)
ds13	2	2	2	1	1	2	1	Ausbildung RD	1	0		1991	5	4	4	2	3	2	3	4	3	3	3	2	3	3	3	Fixierung, Medikation	Differenzierung psych. - physischen Erkrankungen wichtig
ds14	4	3	0	0	0	3	1	FSJ im Krankenhaus	1	0		1999	5	5	4	1	3	2	3	3	3	2	3	2	2	2	3	Zwangseinweisung, Behandlung von Essstörungen
ds15	3	3	0	0	2	4	0		1	0		1999	4	4	2	1	5	2	3	1	3	3	5	3	2	2	3	Immobilisierung bei aggressiven Patienten, Ernährungssonde bei Anorexie
ds16	3	2	2	0	0	5	0		1	0		1999	4	3	4	2	3	0	3	5	3	3	4	3	2	4	5	Zwangsjacke, zwingen Medikamente zu nehmen bei dementen Personen	/
ds17	2	0	2	0	0	1	1	Praktika, Nebenjob in der Pflege	1	0		200	3	3	5	2	3	2	2	4	2	1	3	1	1	2	5	Zwangsernährung, Festbinden
ds18	3	0	2	0	1	3	0		1	0		1998	3	3	4	2	3	2	3	5	4	3	4	2	3	5	5	Einweisung in Psychiatrie, Kindern Blut abnehmen oder sie impfen, Abtreibung nicht durchführen	Zwang ist teilweise zwar nötig sollte aber IMMER vermieden werden, wenn möglich!
ds19	2	3	1	0	2	4	1	2x Praktika im Krankenhaus	1	0		2000	4	3	3	1	3	1	1	3	3	0	3	1	2	4	3	Fixierung, Medikamentenpflicht (z.B. psychisch Kranke), Zwangsernährung, Abtreibung ablehnen gegen Patientenwunsch	Gerade im Umgang mit älteren, regressiven Patienten fällt oft der Vorschlag des Zwangs aufgrund fehlendem Personal
ds2	4	4	1	1	1	3	0		1	1		1998	4	4	2	1	4	-99	3	1	4	3	4	3	2	3	2
ds20	3	1	1	0	2	2	1	Bundesfreiwilligendienst	1	0		1999	4	4	3	2	3	0	3	3	3	2	3	1	4	5	4	Fixierungsmaßnahmen, Beruhigungsmittelgabe
ds21	4	1	1	1	1	4	0		1	0		1999	2	3	5	0	4	2	1	4	3	1	5	2	1	2	3	Zwangsernährung, Impfung (verpflichtend), Bedrohung durch aggressive Patienten, Zwang des Arztes bestimmte Medikamente zu verschreiben (Pharmafirmen)	Jeder Mensch ist per Menschenrecht frei und sollte daher auch als Patient selbst über Behandlung entscheiden dürfen, es sei denn er ist geistig nicht mehr dazu in der Lage rationale / selbstbestimmte Entscheidungen zu treffen
ds22	1	3	0	0	0	5	0		1	1		1999	5	5	5	1	5	1	3	2	4	3	5	1	2	0	2	Fixierung durch Handschellen, Sterilisation von pathologischen Sexualstraftätern	Ich denke, dass Zwang in der Medizin trotz der tw. Notwendigkeit kritisch zu betrachten ist
ds23	3	2	1	0	3	5	0		1	1		2000	2	4	3	1	3	2	2	3	5	1	5	1	2	0	0	/	/
ds24	2	0	1	0	0	0	0		1	1		1994	5	4	3	2	4	2	2	2	4	2	2	2	1	5	5
ds25	2	3	1	1	2	3	1	Praktikum	1	0		1999	2	3	4	4	3	0	3	4	3	2	4	2	3	4	5	/	/
ds26	4	3	2	1	1	3	1	2 Monate Pflegepraktikum	1	0		2000	3	3	5	3	3	1	4	5	3	2	3	2	4	5	5	Tavor / Beruhigungsmittel, um Pat. stillzustellen; "einsperren" von Demenzkranken / psychisch Kranken in ihrem Zimmer durch eine "Bettensperre" vor der Tür
ds27	2	1	1	1	1	1	0		1	0		2000	3	4	5	3	2	1	2	5	3	2	4	3	3	3	5	Aufrechterhalten von lebenswichtigen Funktionen gegen den Willen des Patienten
ds28	4	2	2	1	2	5	0		1	0		2000	3	3	5	2	3	1	2	3	4	2	5	3	2	4	4
ds29	3	2	3	1	3	4	0		1	1		2000	3	3	4	2	3	1	2	4	3	2	3	1	3	4	4
ds3	4	5	0	1	5	5	0		1	1		1999	0	1	5	5	0	0	0	5	3	0	5	3	0	0	5	ruhiges Verhalten - klar, ausführlich und mit einfachen Wörtern dem anderen die Situation zu erklären	/
ds30	4	2	2	0	2	4	1	Pflegepraktikum, Berufspraktikum	1	0		1999	4	3	5	3	3	0	1	0	3	2	2	1	2	1	3	Therapie gegen Magersucht -> Patient muss essen	/
ds31	4	3	1	2	1	3	0		1	0		2000	2	3	5	3	3	0	0	4	0	3	4	1	3	2	5	Spritzen von sedativen Medikamenten, "Aufzwingen" einer Therapie, gegen den Willen des Patienten	/
ds32	4	1	1	1	0	4	0		1	0		2000	3	3	2	2	1	0	1	1	2	2	4	2	0	4	5	/	/
ds33	2	1	1	0	2	4	1	Praktika	1	0		1999	1	1	4	1	2	0	0	4	3	1	3	1	2	3	5	/	/
ds34	3	1	1	0	1	4	1	FSJ	1	0		1999	2	3	4	2	2	1	0	4	1	2	3	1	3	4	5	Zwangsernährung
ds35	4	3	1	2	2	3	0		1	0		2001	3	4	3	2	3	1	2	3	2	2	2	3	2	2	3
ds36	3	4	1	0	2	3	1	Ausbildung RS, Krankenpflege	1	1		1996	4	5	3	1	4	2	2	3	3	2	3	2	2	1	4	PsychKG NRW, Zwangsernährung von Magersüchtigen	/
ds37	0	2	0	0	1	1	1	FSJ	1	0		1999	4	3	4	1	2	0	1	4	1	0	0	0	3	3	5	Fixierung
ds38	3	2	1	0	1	2	1	RS-Ausbildung + Arbeit in diesem Bereich	1	0		1992	2	3	3	1	3	0	1	4	3	3	3	2	2	3	4	Zwangseinweisung bei Personen mit eigen- u. fremdgefährl. Verhalten
ds39	3	2	2	1	2	3	0		1	0		2000	4	4	2	1	5	3	3	2	4	2	3	2	2	3	4	/	/
ds4	2	5	1	0	3	2	0		1	0		1999	3	3	2	1	4	1	3	3	4	4	5	1	1	1	4
ds40	4	3	1	1	3	3	1	Praktika	1	1		1994	4	4	2	1	4	2	4	1	4	2	3	3	1	2	3	Fixierung, Aufsicht, Geschlossene Abteilung	/
ds41	4	4	1	0	1	4	1	Forschung in Medizintechnikunternehmen	4	0		1995	3	4	3	1	4	1	4	2	4	1	4	2	2	2	2	Immobilisierung, Sedierung, Zwangsernährung, Zwangsmedikation, verbinden von Händen etc um Kratzen etc zu vermeiden
ds42	3	2	2	0	1	3	1	Physiotherapie	1	0		1990	3	3	2	2	3	1	3	3	2	-99	3	2	3	4	4	Zwangsernährung, Zwangsmedikation - Ruhigstellung, Fixierung, Isolation, Psychischer Druck in Kommunikation	In den Krankenhäusern ist das Thema Demenz bzw. Umgang damit meist gar kein Thema. Es wird oft nur fixiert
ds43	5	0	1	2	1	2	1	ITS Pflege	1	1		1992	4	5	3	1	3	1	2	3	3	2	3	2	3	4	4	wenig SPielraum in Tageskultur (gleiche Zeit Unterstützung bei Pflege oder eben far nicht), Fixierung des Pat. gegen seinen Willen	Mitarbeiter sollten sensibler sein bei "unnötigem" Zwang
ds44	2	2	1	0	0	1	0		1	0		1999	4	3	3	2	3	1	3	3	3	2	3	1	-99	5	5
ds45	3	2	2	0	0	3	1	FSJ	1	0		1999	3	3	3	1	3	1	2	2	3	2	2	2	2	4	4	Zwangsernährung, Bettgitter hoch bei dementen "nervigen" Patienten, Sedierung
ds5	3	3	1	1	2	1	0		1	1		1986	5	4	3	1	4	2	2	1	3	3	4	2	2	3	3	Immobilisation, Fixierung, Sedierung	Zwang ist nur Situationsabhängig zum Schutz geeignet
ds6	2	1	1	0	2	3	1	Praktikum im Krankenhaus (wie Famulatur)	1	0		1992	2	-99	3	-99	-99	2	2	3	-99	-99	1	1	3	3	-99
ds7	1	5	1	2	1	2	1	Ausbildung Gesundheits- und Krankenpfleger	1	1		1988	4	4	3	1	4	1	2	5	3	1	3	1	2	4	5	Isolation, Fixierung, Zwanghafte Medikamentengabe, Sedierung, Sterilisation von Sexualstraftätern
ds8	4	2	2	1	1	2	0		1	0		1999	3	2	4	-99	1	0	1	3	1	1	0	2	1	2	4
ds9	3	3	4	0	2	4	0		1	0		1999	2	3	5	-99	0	0	2	3	3	2	3	3	2	3	3
jn1	3	1	1	2	1	0	1	Gesundheits- und Krankenpflegerin	1	0		1989	3	3	4	2	2	0	1	4	2	2	3	1	3	5	5	1. Fixierung 2. Demente Patienten, die sich gegen Behandlung / pflegerische Versorgung wehren! und unter Zwang weil Personalmangel + Zeitdruck versagt wird 3. Ärzte / Pfleger halten etwas für notwendig und setzen sich ohne Rücksicht durch	Zwang mMn. nicht notwendig, höchstens in akuten Gefahrensituationen bei veränderten kognitiven Zuständen
jn10	3	2	1	0	2	3	0		1	0		2000	5	5	3	2	4	2	4	3	4	3	4	3	2	2	4	Zwangseinweisung	/
jn11	1	2	1	0	1	4	0		1	0		1999	2	4	5	2	3	1	-99	4	4	1	3	2	3	4	4
jn12	2	3	1	0	4	4	1	4 Monate Praktika im klinischen Bereich	1	0		1999	2	3	4	1	2	1	3	2	2	4	3	2	1	3	3	Fixierung, eventuell Verabreichung von Medikamenten i.v., Zwangseinweisung
jn13	2	4	2	2	3	3	1	Pflege in Psychiatrie (2 Monate)	1	1		1994	4	4	3	2	4	2	3	1	4	2	3	1	2	3	3	Fixierung am Bett, Isolierung in speziellen Zimmern, Zwangsmedikation
jn14	2	4	1	1	1	4	1	Praktikum	1	1		1999	3	3	3	1	1	1	2	3	2	3	4	3	2	3	4	Isolation, Entzug von Medikamenten	/
jn15	5	3	1	1	2	4	0		1	0		2000	2	1	4	4	2	0	1	4	2	2	3	2	2	2	5	Zwangseinweisung, Fixierung, Ruhigstellung
jn16	3	1	1	2	0	2	1	Studium + 11J RD	1	1		1990	4	5	2	0	4	2	1	1	4	2	5	1	3	0	2	Einweisung nach PsychKG, Fixierung nach PsychKG, Maßnahmen nach §34 StGB
jn17	3	0	0	0	2	5	0		1	0		1999	5	5	1	0	4	1	3	3	3	3	4	3	-99	4	3	Zwangsjacke, Zwang zu Essen	/
jn18	3	1	1	1	3	5	0		1	0		2000	5	5	1	0	4	1	3	3	3	3	4	3	-99	4	3	Zwangseinweisung	/
jn19	3	1	1	2	1	3	0		1	1		1998	3	3	3	3	3	3	4	3	3	3	3	2	2	2	5	/	/
jn2	0	0	0	0	0	0	1	Krankenpflegedienst	1	1		1999	4	1	4	1	1	2	3	4	2	2	5	2	0	0	5	Behandlung von psychisch-kranken Patienten	Zwang ist nur dann notwendig, wenn der Patient sein Leben oder das von anderen bedroht
jn20	3	5	1	1	0	5	0		1	1		1999	4	5	2	0	5	3	4	1	4	4	5	3	2	0	4	Sicherung am Unfallsort, zum Schutz; Sicherung von infektiösen/gefährlichen Erregern	Die Würde ist zwar unantastbar, bemächtigt aber keinen Patienten zu Verhalten, das Mitmenschen schadet
jn21	3	4	1	0	1	3	0		1	0		2000	4	4	3	0	4	2	3	4	4	3	1	1	1	1	4	Fixierung an Patientenbett	/
jn22	4	4	0	0	1	1	1	Krankenpflegedienst	1	0		1998	4	4	5	1	2	0	4	3	1	0	3	1	1	0	5	/	/
jn23	3	2	2	1	1	3	0		1	0		1999	3	4	2	2	3	2	3	2	3	2	4	2	-99	-99	3
jn24	4	4	2	1	2	3	1	Ausbildung	1	0		1991	4	4	3	2	4	2	3	3	3	2	3	2	2	4	4	/	/
jn25	2	0	0	0	0	4	1	Krankenschwester	1	0		1992	3	4	4	3	3	0	3	2	1	1	5	0	2	4	5	Zwangsfixierung, Zwangsmedikamentengabe, Zwangsunterbringung	/
jn26	4	2	0	0	2	4	1	Ausbildung Krankenpflege	1	0		1991	2	4	3	2	3	1	1	3	2	1	3	2	2	2	3	Ruhigstellung durch Medikamente, Fixierung (z.B. ans Bett)
jn27	2	3	0	2	0	5	0		1	1		1988	5	5	3	0	4	2	4	3	5	1	4	1	1	5	5	Festbinden, geschlossene Psychiatrie
jn28	4	3	1	1	2	4	1	Johanniter KTP	1	1		1999	3	3	3	2	1	2	3	3	2	2	4	-99	2	-99	3	Gabe von Medikamenten ohne ausdrückliche Zustimmung des Patienten
jn29	3	3	2	1	2	4	0		1	1		2000	4	4	4	2	3	1	3	3	4	2	2	2	3	4	4	Verhindern des Aufstehens des Patienten aus dem Bett (Bettgurt)
jn3	2	2	2	0	3	3	0		1	0		1999	3	3	2	3	3	2	2	3	3	2	3	3	2	3	3	1. Der Patient muss besser informiert sein 2. Der Patient muss seine Rechte kennen.	Nein
jn30	5	5	0	0	3	3	1	Pflegepraktikum	1	0		2000	3	3	3	2	3	2	3	4	3	3	2	3	2	4	4	hineinversetzen in Patienten, deren Sorgen/Ängste verstehen, erklären, warum Behandlung erforderlich, was genau passiert -> Pat. überzeugen, von sich aus einzuwilligen, Sinn d. Maßnahme einzusehen
jn31	2	5	1	1	2	4	0		1	0		1998	3	3	3	2	3	2	3	4	3	3	4	3	2	-99	5	Bettfesseln für demente/aggressive Patienten
jn32	3	1	1	0	1	1	0		1	0		1997	2	2	5	2	0	0	0	4	2	1	1	1	-99	-99	-99	Ernährung von Patienten mit Essstörung
jn33	4	3	2	1	1	4	0		1	1		2000	4	4	4	2	3	2	3	4	4	3	4	3	2	2	4		/
jn34	4	4	2	4	3	5	1	Pflegepraktikum	1	1		2000	4	4	3	2	-99	1	2	4	3	0	3	2	3	0	3		/
jn35	3	3	0	1	4	3	0		1	0		2000	4	4	4	2	3	1	2	4	4	3	5	3	3	4	5		Zwang sollte nur bei Patienten angewendet werden, die keine Entscheidung für sich selbst treffen können. -bewusstlos - Alzheimer etc.
jn36	4	4	2	0	1	1	0		1	0		1999	3	3	3	1	3	0	3	3	1	0	4	3	2	2	5		Einem Menschen, der sich nicht behandeln lassen will, darf die Behandlung nicht erzwungen werden -> ausgenommen psychische Störungen, die die Gesellschaft/Zivilisten gefährden
jn37	0	2	1	0	2	3	0		1	0		2000	3	3	4	2	4	1	3	3	3	3	2	2	2	4	4	Zwangsernährung von Magersüchtigen, Ruhigstellung von z.B. aggressiven Patienten
jn38	4	4	0	1	0	5	0		1	0		2000	5	5	1	0	4	2	4	2	5	3	5	-99	-99	-99	5	Zwang zur Behandlung (Zwangseinweisung in die Psychiatrie, bei Patienten ohne Krankheitseinsicht trotzdem behandeln etc)	Nein
jn39	5	3	1	0	2	3	1	MFA	1	0		1984	4	3	3	1	3	2	-99	3	4	2	4	2	2	3	4	Maßnahmen in der Psychiatr. Klinik; Demenz-Pat (fesseln), Arzt zwing Pat. Meinung/Behandlung auf
jn4	3	4	1	1	4	3	1	Rettungsdienst	1	1		1996	4	4	3	1	4	2	3	4	4	2	4	2	2	4	5	Zwangseinweisungen psychisch kranker Patienten oder Patienten mit suizidalen Absichten	Ich manchen Fällen sind Patienten, die kurz vor dem Suizid standen nach der Einweisung/Behandlung dankbar für die "zweite Chance"
jn40	4	0	0	0	0	3	0		1	0		1999	5	5	2	2	4	2	3	2	3	2	4	2	2	3	4	Fixieren der Patienten
jn41	2	3	0	0	1	3	1	Pflegedienst 6 Monate (BFD)	1	-99		1998	3	3	5	2	2	0	2	4	2	3	3	2	-99	4	5	Fixierung per Hüftgurt, Medikamentengabe ohne Einverständnis	Die Frage nach dem Zwang in der Medizinischen Versorgung ist hochkomplex und könnte ganze Hausarbeiten füllen. Ich finde es etwas fragwürdig, diese in einer 5 minütigen Umfrage abzufragen ...
jn42	4	2	0	0	1	2	0		1	0		1998	3	3	2	2	4	1	3	4	3	2	4	3	3	5	5	Fixierung von Patienten
jn43	3	3	0	1	2	3	0		1	0		1997	4	4	5	2	3	1	3	4	3	2	4	4	-99	3	5	Zeit nehmen, Aufklären & erklären kann meiner Meinung nach Zwang verhindern z.B. auch bei Demenzkranken Patienten / Vertrauen fördern
jn44	3	3	2	0	2	2	1	als forschende Ernährungswissenschaftlerin (Forschung mit Patienten, im Uniklinikum) + Pflegepraktika	1	0		1994	3	5	4	2	4	3	3	3	4	4	5	4	1	1	1	/	schwieriges Thema, individuell versch. handzuhaben
jn45	4	2	0	1	3	3	1		1	0		1996	3	3	4	2	3	3	3	4	4	3	5	4	2	2	4
jn5	3	0	1	2	2	5	0		1	0		1999	5	4	1	2	1	0	-99	3	1	4	5	0	1	0	5	Einschränkungen der Bewegungsfreiheit
jn6	4	3	2	3	3	3	0		1	1		1995	4	4	3	3	3	2	3	3	3	2	3	3	3	4	4	Physischer Zwang
jn7	3	3	1	1	3	3	1	FSJ, Ausbildung	1	0		1988	4	5	5	1	3	0	3	5	0	3	5	2	3	4	5	oft Unsicherheit seitens der Mediziner -> bessere psychologische Schulungen	/
jn8	4	2	0	0	0	3	1	Pflegepraktikum	1	0		1988	4	4	2	1	4	2	3	1	3	2	4	3	1	1	3	Tablettenname, Physiotherapiemaßnahmen
jn9	5	5	1	0	1	4	1	Nebenjob im Pflegedienst	1	1		1984	4	4	4	2	4	0	4	3	4	1	5	1	2	5	5	Fixierung von Patienten
ms1	1	0	1	1	2	4	0		2	1		2000	3	4	2	1	5	1	3	3	4	4	3	3	2	3	4
ms10	2	1	2	0	2	3	0		2	0		1999	3	3	2	3	2	0	2	3	3	2	2	2	1	2	3
ms11	2	0	2	0	2	1	0		2	0		1999	3	2	4	3	2	1	2	4	3	1	3	3	2	3	4
ms12	1	2	0	1	1	2	0		2	0		2000	4	3	5	2	1	2	1	4	3	2	3	2	2	-99	1
ms13	3	2	2	2	1	3	0		2	0		2000	3	3	4	3	3	2	2	3	3	2	2	2	2	2	3	Zwangseinweisung
ms14	4	4	1	1	2	4	1	Praktika	2	0		1998	4	4	4	2	3	2	2	4	3	3	4	3	2	4	4	Einweisung	/
ms15	5	4	1	1	1	3	0		2	0		1995	4	4	3	1	2	2	2	3	3	2	4	1	5	5	3	Fixierung, Aufenthalte in geschlossenen psychiatrischen Anstalten gegen den eigenen Willen
ms16	2	1	1	0	2	2	0		2	0		1999	4	4	5	3	2	1	3	4	3	2	4	3	2	4	5	das Fesseln ans Bett, evtl. Beruhigung über Einläufe, geschlossene psychiatrische Kliniken	Meiner Meinung nach ist persönlicher Kontakt und Empathie sehr wichtig und würde evtl. weniger Zwang benötigen
ms17	3	3	2	1	1	2	0		2	0		2000	4	4	3	2	2	2	3	4	3	2	2	2	3	1	4	Maßnahmen zur Beruhigung/Ruhigstellung von Patienten, die sonst sich selbst oder anderen schaden würden
ms18	5	3	1	0	3	5	1	Praktika	2	0		1998	3	4	5	3	3	1	3	4	3	2	5	2	1	4	5	Aufklärung d. Patienten, Eingehen auf ängstliches Verhalten & Fürsorge
ms19	5	5	1	0	1	5	0		2	0		1999	0	0	5	4	1	1	5	4	-99	0	0	0	0	0	5	/	/
ms2	5	3	3	1	4	4	0		2	1		2000	4	5	4	1	4	2	4	0	4	5	4	3	1	2	4
ms20	3	4	2	0	1	4	0		2	0		2000	2	2	4	2	3	2	4	3	4	3	3	3	3	4	4
ms21a	4	5	2	0	2	5	1	Praktikum	2	1		2000	4	5	3	0	5	1	5	2	4	5	5	4	2	3	3	Zwanghaftes Einführen von Medikamenten
ms22	3	2	1	0	1	4	1	Krankenpflegepraktikum	1	1		1999	4	4	2	0	5	3	3	1	4	2	5	3	2	2	5	Zwangsernährung Anorexia nervosa	Zwang - gemeint ist: Verantwortungsbewusstes Entscheiden über den Pat. - spricht nicht die Würde des Menschen ab, sondern es ist die Situation/Erkrankung, die das Person-Sein angreift.
ms23	3	1	1	0	1	4	1	Ausbildung	2	0		1991	4	4	2	1	3	2	3	2	1	1	2	2	1	1	2
ms24	3	3	5	1	3	4	1	Rettungssanitäter	1	1		1999	5	5	5	1	5	2	3	5	2	3	5	0	0	0	3	Zwangseinweisung, Fixierung, Isolation	Eigensicherung ist die oberste Priorität und mit dem Schutz dritter oder des Patienten die einzige Weise, die Zwang rechtfertigt. Behandlungsmaßnahmen sollten trotzdem abgesprochen werden
ms25	4	4	1	1	3	2	1	3 Monate Krankenpflegepraktikum	1	0		1998	4	4	3	1	4	2	3	1	4	3	5	3	0	3	1	Intubation, Bringen aus Gefahrensituationen	/
ms26	3	1	1	0	1	5	1	3-monatiges Pflegepraktikum	1	1		1999	5	4	4	2	3	1	3	2	3	0	3	2	2	2	4	Zwangsernährung, Fixierung	unklare Definition von "gefährliche Situationen"
ms27	4	3	2	2	1	2	0		1	0		1998	4	4	3	1	-99	3	2	1	3	2	5	3	2	4	3
ms28	3	0	1	2	0	1	1	FSJ, Ausbildung als Logopädin	1	0		1994	1	2	4	2	3	0	2	5	3	3	2	2	3	4	5	Fixierung am Bett, Zwangsernährung
ms29	4	3	1	1	3	4	0		1	0		1991	3	3	3	2	3	1	3	3	2	2	3	2	4	4	5
ms3	4	3	1	0	3	5	0		2	1		2000	3	4	3	0	4	2	4	1	4	0	2	0	2	4	3	/	Nein
ms30	5	3	2	0	1	4	0		2	1		1994	2	2	4	3	3	2	2	2	3	2	5	2	0	0	2	gar nichts, da Zwang in Zahnmedizin nicht notwendig ist	Nö
ms31	4	2	1	1	3	2	1	Krankenpflegeausbildung	1	1		1988	3	3	3	2	4	1	3	3	2	3	4	-99	2	5	5	Bettgitter, Fixierung, Medikamentöse Beruhigung des Patienten, Pat. darf nicht aufstehen	die letzten beiden Punkte zu "knappe Ressourcen" & "mehr Zeit und persönlichen Kontakt" sind besonders relevant
ms32	3	0	3	0	5	3	0		2	0		1998	3	4	2	3	2	1	0	3	2	4	2	3	1	0	2	Aggressiv & Druck, Heilung psychische Probleme
ms33	3	1	1	0	0	5	1	Praktikum	3	0		1999	3	3	5	3	2	1	3	5	3	3	3	1	1	3	5	Fixieren von Patienten gegen ihren Willen
ms34	4	4	1	0	3	-99	0		3	0		1998	5	4	3	1	4	1	1	3	3	3	4	3	2	3	3	Fixieren bei psychischen Ausbrüchen. Festhalten von alkoholisierten oder benommenen Pat. zum Selbstschutz oder zum Schutz der Umgebung	unter Umständen ist besonders eine Fixierung zum Schutz d. Patienten und d. Personals sofort notwendig
ms35	4	1	0	0	0	2	1	Praktikum	3	0		1994	4	4	3	1	3	0	4	2	5	3	5	3	1	-99	5
ms36	2	3	1	0	1	3	0		3	-99		1997	3	3	4	2	3	2	1	2	2	-99	3	-99	-99	-99	3
ms37	1	2	1	0	0	3	0		3	0		1995	3	3	4	2	3	2	3	3	3	2	3	2	2	2	3
ms38	2	0	1	0	2	3	0		3	0		1996	3	3	3	2	3	2	1	3	0	2	3	2	2	3	4	Selbstschutz für den Patienten z.B. Fixieren wenn GEfahr für sich & andere
ms39	1	4	2	0	5	0	0		3	0		1998	4	4	2	2	3	1	1	3	2	4	3	1	1	1	4
ms4	3	2	0	0	2	4	1	Krankenpflegepraktikum	2	0		1998	5	4	3	1	4	2	3	1	5	0	3	3	2	1	3	Medikation	Antworten sind auf Krankenhausalltag bezogen.
ms40	4	4	2	0	0	1	1	Praktikum	3	0		1991	4	4	3	2	3	2	-99	-99	3	2	4	3	-99	3	5
ms41	0	2	1	0	1	1	0		3	0		1996	3	3	4	1	3	1	3	3	2	2	0	0	2	1	4
ms42	4	1	1	0	4	5	0		3	1		1998	4	4	2	1	5	2	5	0	5	4	3	4	2	2	2	/	/
ms43	3	3	0	0	1	3	0		2	1		1998	4	-99	3	1	-99	1	2	-99	3	2	4	2	1	2	3	Fixierung
ms44	3	2	2	2	3	3	0		2	1		1996	5	5	4	1	4	2	4	1	3	0	4	1	1	4	2	Fixierung
ms45	4	0	1	0	1	3	1	Zahnarztpraxis	2	0		2000	4	4	1	0	3	1	5	2	3	1	2	2	1	1	2	Fixieren
ms46	4	3	1	0	1	2	0		2	1		1991	4	4	2	0	4	2	3	2	5	2	5	3	1	0	3	Fixierung	Nein
ms47	3	4	1	1	1	5	1	Praktikum	1	0		1994	3	2	2	2	4	1	1	1	4	-99	3	0	2	4	4	Zwangsernährung, Zwangseinweisung
ms48	4	2	2	1	2	3	0		1	0		1999	3	3	3	2	3	1	3	2	-99	-99	3	-99	-99	3	3
ms49	3	1	1	0	1	4	0		1	0		1999	2	4	3	2	4	2	3	2	5	2	5	3	2	3	4	schwer psychisch kranke Patienten, Patienten, die kein Vertrauen zum Arzt haben
ms5	-99	3	1	3	1	4	0		2	1		1998	3	3	4	3	4	1	4	3	3	2	4	2	2	2	3	bei für andere oder den Patienten gefährlichen Umständen einzugreifen	Nein
ms50	4	3	3	2	2	3	1	Arbeit als Arzthelferin, Studium Logopädie	3	0		1990	5	5	3	2	3	2	3	2	5	2	4	3	2	2	4	Zwangsjacke,Injezieren bei gefährlichen Situationen wie z.B. anaphylaktischem Schock
ms51	3	1	2	0	1	2	0		3	0		2000	2	2	5	2	2	0	3	5	3	2	4	2	2	2	3	Zwangseinweisung
ms52	2	0	2	0	0	0	0		3	0		1996	3	3	4	4	1	0	2	5	2	1	3	0	3	4	5	Dass ich gezwungen bin an der Vorlesung/dem Seminar med. Termi teilzunehmen, obwohl ich Logopädie studiere.	Diese Vorlesung ist kacke.
ms53	2	0	2	0	0	3	0		3	0		2000	2	2	3	3	2	-99	2	4	2	2	2	2	1	2	3	Zwangseinweisung, Zwangsernäherung	/
ms54	3	3	1	0	0	3	1	Ausbildung im Rettungsdienst	1	1		1994	4	4	1	0	4	2	3	4	3	1	5	1	2	1	4	Psych-KG, Bevormundung
ms55	5	0	0	0	0	0	0		1	1		1999	5	5	4	0	5	0	0	3	1	3	0	3	1	5	5	Zwanghaftes Impfen gegen Krankheiten	/
ms56	4	2	2	2	2	5	1	FSJ	1	0		2000	5	5	2	2	4	2	5	2	5	3	5	2	3	2	5	Patienten einschränken, dass heißt am Bett festmachen etc.	Generell finde ich in der MEdizin, werden Patienten nicht oft genug ernst genommen und die Ärzte haben generell zu wenig Zeit
ms57	4	4	1	2	3	-99	-99		3	0		1999	3	3	4	2	4	2	3	2	3	2	3	2	3	2	4
ms58	4	3	1	1	2	4	0		1	1		1999	4	5	3	1	4	2	3	2	-99	3	4	5	2	4	5
ms59	4	4	2	2	2	3	-99		3	1		1996	4	4	4	2	1	2	2	2	2	2	2	2	2	2	2
ms6	3	3	2	1	2	3	0		2	0		1999	2	2	4	3	2	1	3	4	2	2	2	2	3	3	4	Bettfesseln, medikamentöse Ruhigstellung	/
ms60	3	4	2	0	2	4	0		3	0		1999	4	4	3	2	4	1	2	3	4	4	4	3	3	3	3
ms61	3	3	1	0	2	3	0		3	0		2000	4	4	2	2	4	2	2	3	4	3	4	2	3	3	4	/	/
ms62	3	4	1	3	3	3	0		3	0		1998	4	3	4	2	3	3	3	2	-99	1	5	4	3	4	3	Zwangsjacke, Fixierung, Gabe von sedativen Medikamenten zur Beruhigung	/
ms63	3	3	2	1	1	3	0		3	0		1991	3	3	2	2	3	2	3	2	3	3	4	3	2	3	3
ms64	4	4	3	1	0	4	0		2	0		1999	4	4	2	1	2	1	2	1	3	2	5	1	1	1	5
ms65	4	4	3	1	2	3	0		2	0		1999	2	3	3	2	2	1	3	3	4	3	5	4	2	3	5
ms66	2	3	2	0	1	2	1	Pflegepraktikum, Schülerpraktikum	1	0		1999	3	3	4	2	4	1	3	3	2	2	3	2	3	4	4	Fixierung, Zwangsernährung, generell Maßnahmen gegen den WIllen des Patienten (z.B. Medikamenteneinnahme)
ms67	4	5	0	1	1	4	1	Pflegepraktikum	1	0		1999	3	3	4	2	4	2	3	2	3	2	4	3	3	2	4
ms68	1	3	0	0	0	1	1	Ausbildung/Studium	4	0		1989	2	4	4	1	2	0	2	3	3	0	3	0	2	1	3	Psychiatrische Patienten, Fixierung, "geschlossene" Einrichtungen	Fraglich: Zwangseinweisung bei suizidalen Patienten => Selbstbestimmung dadurch eingeschränkt
ms69	4	1	0	1	1	2	0		4	0		1992	3	4	2	2	3	1	4	2	3	2	4	2	2	4	4	Zwangsmedikation, Zwangseinweisung, Fixation	/
ms7	3	1	2	1	2	3	1	Kreissaalpraktikum	2	0		2000	3	4	3	2	3	0	2	3	3	2	4	2	-99	5	5	Das Erzwingen von Medizineinnahme bei älteren, geistig verwirrten oder jungen Patienten. Absprache der Mündigkeit	Ich denke, es sollte zwingend zwischen hilflosen oder gefährlichen Patienten und denen, die nicht die gängige medizinische Meinung teilen unterschieden werden
ms70	5	3	0	0	1	4	1	FSJ	1	0		1999	5	4	4	1	4	2	3	3	3	4	3	3	2	2	2
ms71	4	1	1	1	1	5	1	Bundesfreiwilligendienst, Physioausbildung	1	0		1996	2	4	4	1	4	0	4	2	3	4	4	3	2	1	5	Patienten mit psychologischen Erkrankungen
ms72	4	3	0	2	3	3	1	FSJ	1	0		2000	5	5	2	1	4	3	4	1	5	2	5	3	1	1	4
ms73	2	4	3	0	2	4	1	Ausbildung/beruf	1	1		1996	4	4	5	2	4	1	2	3	1	2	3	2	1	1	4	Unterbringung nach PsychKG
ms74	5	3	1	2	3	5	0		1	0		1997	4	5	3	1	4	2	4	2	4	1	5	2	2	3	4
ms75	4	2	4	0	2	3	0		1	0		2000	3	3	4	2	4	1	2	3	4	3	4	3	2	4	5
ms76	3	3	2	1	1	3	1	Pflegepraktikum	1	0		2000	2	3	3	1	3	3	4	4	3	3	3	3	2	2	3	Mit Zwang verbundene nötige Operationen oder Restriktionen die zwingend notwendig für das Wohlergehen des Patienten sind
ms77	4	1	2	1	2	3	0		1	0		1997	4	4	2	2	4	3	4	2	4	2	4	3	2	4	4
ms78	3	4	1	0	0	3	1	Pflegepraktikum - Kinderstation, Praktika	2	0		1999	4	4	4	2	3	2	2	0	3	0	4	3	1	1	5	Beruhigungsmedikamente oder Zwangsjacken
ms79	2	3	2	2	2	1	0		2	0		1999	4	4	3	2	4	2	2	2	1	3	3	2	2	2	4	fehlende Sterbehilfe, Reaniomationen, psychatrische Bereiche
ms8	5	1	1	0	0	1	1	BFD in der Dialyse	2	0		1998	3	3	4	3	3	0	1	5	3	1	3	2	4	3	5	bessere und Vertrauenswürdige Auseinandersetzung mit dem Patienten. Ärzte sollten sich mehr Zeit nehmen	/
ms80	3	4	2	2	2	2	1	Praktikum	2	0		1995	3	3	4	2	3	0	2	3	1	2	3	2	2	3	4	Fixierung aggressiver / psychisch kranker Patienten
ms81	5	3	2	2	2	2	0		2	0		2000	2	3	3	2	3	2	3	3	3	3	3	3	2	2	3
ms9	4	1	1	0	0	2	1	FSJ, Pflegepraktikum	2	0		1998	2	2	4	1	3	0	1	4	1	0	2	0	-99	5	5	Bettfixierung, Zwang Medikamente zu nehmen. Zwang zu essen, Zwang z.B. im Krankenhaus oder Altenheim zu sein, eventuell auch Zwang zu leben durch lebenserhaltende Maßnahmen
sk1	4	1	1	1	2	3	1	Pflegepraktikum	1	1		2000	4	3	3	2	4	1	2	2	4	2	4	2	3	3	4
sk10	1	1	2	2	3	2	1	Krankenpflegepraktikum	1	0		1999	2	3	3	2	3	2	2	3	3	2	4	2	2	4	4	Isolationszimmer für Infektiöse Krankheiten, Zwangseinweisung in die Psychiatrie	zählt die Überredungskunst des Arztes / der Krankenschwester auch zu Zwang?
sk11	4	2	4	2	2	3	0		1	0		2000	3	3	5	4	1	1	3	4	2	3	4	2	1	3	3	Zwangsernährung bei Magersucht
sk12	3	0	2	0	0	3	0		1	0		1999	3	3	3	2	3	0	0	4	3	0	2	0	-99	-99	4	Fixiergurt, Bettgitter
sk13	2	0	1	0	0	2	0		1	0		1999	2	3	3	2	3	0	2	4	2	1	2	1	3	2	3	Körperliche Restiktion der Bewegungsfreiheit, Zwangseinweisung in psychiatrische Aufenthalte	Nee, danke.
sk14	3	1	1	0	0	1	0		1	0		2000	3	3	4	2	2	0	1	5	3	2	3	1	2	3	4	/	/
sk15	3	3	0	0	0	3	1	Pflegepraktikum etc.	4	0		-99	4	3	3	1	3	0	0	4	2	3	5	0	3	4	4	5-Punkt fixierung von Dementen Personen, da die Betruung von Patienten z.B. mit Weglauftendenz für das Pflegepersonal zu lästig ist!!!	Wenn demente Patienten eine 5-Punkt-Fixierung bekommen, sich nicht bewegen könne, das essen gebracht wird, wieder abgeräumt wird ohne das diese trotz Fähigkeit selbst zu essen, nicht losgeschnallt werden und da ja nicht gegessen werden konnte! da ja fixiert! eine Sondenernährung favorisiert wird, aus reiner Bequemlichkeit des Pflegepersonals obwohl bei Patienten die volle Funktionsfähigkeit und d…
sk16	3	1	1	0	0	2	1	Krankenpflege	1	1		1990	5	5	3	1	3	1	3	2	4	2	4	1	2	5	5	Fixierung, Zwangsbeatmung
sk17	2	1	1	1	2	2	0		1	0		1999	3	3	5	4	2	1	2	4	3	2	3	2	3	3	5	Zwangsernährung von Demenzkranken
sk18	4	3	2	0	1	3	1	Pflegepraktikum	1	1		1999	4	4	3	2	3	-99	4	3	3	2	4	3	3	4	5
sk19	3	4	1	0	1	2	0		4	0		1991	4	4	4	1	3	2	1	3	3	2	3	2	4	4	4
sk2	3	3	2	1	2	4	0		1	1		2000	2	3	3	2	3	2	3	2	3	1	4	3	2	2	4	?	?
sk20	4	3	1	0	2	3	0		1	0		2000	4	3	3	2	3	1	2	4	3	3	3	3	2	2	4	Zwangsernäherung bei Magersucht	Nein, danke
sk21	2	2	1	0	1	3	1	Praktika	1	0		1999	3	3	1	1	-99	1	2	3	-99	-99	3	1	-99	1	3	Bettgitter, Zwangsjacken, Festhalten bei Behandlung
sk22	3	2	0	0	0	4	1	Ausbildung Gesundheits- und Krankenpflege + 4 Jahre Berufserfahrung	1	0		1992	2	1	4	3	1	0	2	4	2	1	1	1	3	4	4	Fixierung bei deliranten und dementen Patienten; Anordnung von Medikamenten und Untersuchungen ohne Patientenabsprache	/
sk23	2	3	0	0	1	2	0		1	0		1999	3	4	4	2	3	0	3	4	4	2	2	1	3	3	4	Zwangssterilisation (NS-Medizin); Lebenserhaltende Maßnahmen
sk24	2	-99	2	0	2	4	0		1	0		2000	3	3	-99	1	4	0	-99	1	-99	-99	4	2	-99	-99	5	Zwang zu bestimmten Therapiemaßnahmen	mehr Zeit, Mitfühlsamkeit, Aufklärung bei Mitteilung schwerer Krankheit
sk25	4	3	0	0	0	2	0		1	0		1998	3	3	5	2	4	0	3	4	2	3	5	4	3	4	5
sk26	2	2	1	0	2	3	1	Rettungsdienst	1	1		1998	5	5	4	2	3	1	2	3	3	3	4	2	2	4	4	Zwangseinweisungen, Zwangsernährung, Infusionstherapie
sk27	2	2	2	0	0	-99	1	Pflegepraktikum	1	0		1997	3	3	3	2	3	2	1	3	2	1	3	1	3	3	4	Zwangsernährung
sk28	3	4	2	1	1	0	0		1	0		1999	3	4	3	3	3	2	3	2	4	2	3	3	2	3	3
sk29	4	4	1	1	2	3	1	Freiwilligendienst	1	0		1999	3	3	4	-99	4	1	1	-99	-99	-99	-99	-99	-99	-99	-99
sk3	0	1	0	0	0	5	1	Physiotherapie	1	1		1991	5	5	5	1	3	1	2	4	2	1	5	1	2	5	5	Fixierung, Fallzahlen - DRGs
sk30	4	5	1	1	3	4	0		2	0		1998	3	3	2	-99	3	-99	4	2	3	2	3	3	2	3	3	/	/
sk31	2	5	2	1	3	4	0		1	0		2000	3	3	3	2	3	-99	3	-99	3	-99	4	3	-99	-99	4
sk32	3	5	3	1	0	4	0		1	0		1999	4	4	4	4	4	3	5	2	4	4	4	2	1	4	3
sk33	3	4	0	0	2	2	0		1	1		1999	4	4	5	3	2	4	-99	5	3	4	5	1	4	2	1		Nein
sk34	3	0	1	1	1	2	1	BFD	1	0		1998	4	4	3	2	4	0	4	3	4	1	4	1	2	4	3	PsychKG	Zur Eigensicherheit und zur Sicherheit des Patienten sollte Zwang anzuwenden erlaubt sein
sk35	2	3	2	0	1	3	0		1	0		1998	3	3	2	2	3	2	2	3	3	2	2	3	2	2	5
sk36	4	1	2	0	0	2	0		1	0		1999	3	3	2	2	3	0	1	3	3	2	2	2	-99	3	3	Zwangsernährung (z.B. bei Magersucht); Zwangseinweisung
sk37	3	1	3	0	0	2	0		1	0		2000	4	4	5	2	4	1	2	2	3	2	4	2	3	4	5	Maßnahmen, um psychisch erkrankte Personen vor Selbstverletzung zu schützen - im juristischen Fall durch ein Festschnallen am Bett; Lebenserhaltende Maßnahmen ohne Patienteneinwilligung
sk38	3	1	2	0	1	3	1	FSJ im Krankenhaus	1	0		1999	3	3	2	2	4	1	3	3	3	1	3	-99	2	4	5	Fixierungen, medikamentöse Beruhigung, Einschließen, Zwangseinweisung, Zwangsernährung	Problematik der zeitlichen Verfügbarkeit zum erlassen eines richterlichen Beschlusses
sk39	1	2	0	0	2	3	0		1	1		2000	3	3	3	1	3	0	3	3	3	1	2	1	3	3	4
sk4	4	3	0	0	0	4	1	Physiotherapeut	1	1		1991	2	4	3	2	2	2	2	5	2	3	5	3	2	3	5	finanzielle Mittel
sk40	4	3	2	0	0	3	0		1	0		2000	3	3	3	2	3	0	3	4	3	5	3	1	-99	3	3
sk41	3	2	1	0	1	3	0		1	0		2000	3	3	2	1	3	1	3	2	3	2	3	1	2	3	3	medikamentöse Beruhigung
sk42	4	1	1	4	0	4	0		4	0		1992	4	4	3	3	1	1	3	4	3	3	4	2	2	2	4	Mehr Kommunikation
sk43	4	1	3	1	1	3	0		-99	-99		-99	3	4	3	3	2	2	2	-99	3	3	4	3	2	4	4	/	/
sk44	2	1	2	0	0	4	0		1	0		2000	3	4	4	3	4	1	3	3	4	2	4	2	1	3	4	Fixieren, zum Essen zwingen bei Bolemie
sk45	2	4	2	1	2	3	0		1	0		1999	3	3	4	3	2	0	3	2	2	1	4	1	3	2	4	Fixierung; Geräte anlassen; zu Untersuchung verpflichten	/
sk46	4	1	1	0	1	3	0		1	0		2000	3	3	4	1	3	1	3	3	3	1	2	1	2	3	3	Fixieren, Einschließen
sk47	3	3	2	2	2	3	0		1	0		2000	3	3	3	2	2	2	2	3	2	2	3	2	2	2	3	Zwangseinweisung in eine Klinik	/
sk5	3	3	1	1	2	2	1	FSJ Anästhesie	1	0		1990	3	3	4	1	3	1	3	3	2	3	3	2	2	2	5	Zwangsernährung bei Kachexie, Fixierung des Patienten zur eigenen Sicherheit
sk6	4	2	2	2	2	4	1	Zivildienst	1	1		1989	4	4	3	2	3	1	4	3	3	2	4	3	1	3	4	Zwangsernährung
sk7	5	4	1	2	2	5	0		4	0		1990	5	4	3	2	3	2	3	2	3	3	5	3	2	1	4	Das teilweise versucht wird Normwerte zu erreichen unabhängig, ob es dem entsprechenden Patienten damit wirklich besser geht	es wird zu wenig Wert auf Patienten als Individuum gelegt, meistens wird versucht mit allen Mitteln Normwerte zu erreichen!
sk8	4	1	1	1	1	3	0		1	1		1999	3	3	4	1	4	2	3	2	2	1	4	1	2	3	4	Sedierung zur Ruhigstellung von Patienten	/
sk9	3	2	1	1	1	4	1	FSJ	1	0		1997	4	4	3	1	3	1	4	3	5	4	4	3	2	3	3	Fixieren, Medikamente auch gegen Wille, Sedierung
sw1	4	2	1	1	3	2	1	beruflich	1	0		1994	5	5	3	2	4	3	2	1	3	3	5	4	2	4	3	Fixierung	Es kommt sehr stark auf die Art der Behandlung an, weshalb ich das obige Ankreuzen sehr schwierig fand. Ein "Festhalten" eines dementen Patienten auf Station ist m.E. ganz anders zu bewerten (positiv in diesem Fall) als geistig zurechnungsfähige Patienten zwanghaft festzuhalten.
sw10	4	3	2	1	1	2	0		1	0		1999	4	4	3	2	3	2	1	3	5	4	5	4	3	3	-99
sw11	4	4	2	-99	3	3	0		1	0		2000	4	4	3	2	3	2	3	2	3	3	3	3	2	3	4
sw12	4	1	2	2	2	4	0		1	1		1998	4	3	3	2	3	2	3	3	3	2	2	2	3	2	4
sw13	3	1	3	0	3	2	0		1	0		1999	5	5	4	4	4	3	3	2	3	3	4	3	-99	2	3		Nein
sw14	3	3	1	1	2	4	0		1	1		2000	2	2	2	0	3	1	3	2	3	1	3	3	1	2	3	/	/
sw15	3	1	1	0	3	2	0		1	1		1999	2	3	4	3	2	0	0	4	3	0	2	2	3	3	5	Zwangsmaßnahmen bei Magersucht (künstliche Ernährung), Befestigung des Patienten bei Anfällen oder psychischen Erkrankungen	Zwang sollte unter allen Umständen vermieden werden. Stattdessen muss mehr Zeit in die Arzt-Patienten-Beziehung gesteckt werden. Trotzdem ist Zwang teilweise sinnvoll (aber nur kurzfristig und nur akut)
sw16	4	2	1	0	0	3	1	Ausbildung operationstechnische Assistentin (+ Berufserfahrung darin)	1	0		1991	3	4	3	1	4	2	3	2	3	1	4	1	2	1	2	festgurten, Fixierung, Ruhigstellung (Medikamente)	Zwang ist leider manchmal notwendig zum Schutz des Patienten + seiner Umgebung (vor sich selbst)
sw17	1	4	0	1	2	5	0		1	0		2001	4	4	3	1	3	1	1	3	5	1	4	1	2	0	3	Zwangsernährung bei Esssötungen, Ans Krankenbett anketten bei aggresivem Verhalten psychiatrischer Patienten
sw18	3	4	1	1	2	3	1	Ausbildung + Berufserfahrung (5 Jahre)	1	0		1991	4	4	3	1	3	2	3	3	2	3	4	2	2	5	5	Medikamentöse Ruhigstellung, Fixierung (Fünf-Punkt), Bettgitter, des Übergehen einer Patientenverfügung/des Patientenwillens	Eine deutliche Sensibilisierung zum Thema "Ethik in der Medizin" sollte Pflicht im Studium sein
sw19	3	3	0	0	4	3	0		1	0		1997	3	3	4	2	3	2	2	2	2	-99	3	2	2	2	2
sw2	4	3	2	0	1	4	0		1	0		1999	5	5	3	1	5	0	3	3	5	3	2	-99	1	4	5	Zwangseinweisung
sw20	4	3	1	1	3	3	1	Ausbildung	1	-99		1998	4	4	5	2	4	2	3	4	2	2	3	2	2	2	3	Fixierung, Zwangseinweisung
sw21	3	4	4	0	2	3	1	Gesundheits- und Krankenpflege	1	1		1989	4	4	3	1	4	0	1	2	4	3	3	2	1	2	5	Fixierung bis zu 24h, Gitterbett	Personalmangel kann zu unnötigem Zwang führen
sw22	3	4	2	0	1	5	0		1	0		2000	4	4	3	0	3	1	3	-99	3	1	4	2	1	3	3		Nein
sw23	4	0	1	3	1	0	1	Pflegepraktika	1	0		1990	4	3	5	3	3	0	1	4	3	1	4	3	2	3	4	Fixierung Psychiatrie / geschlossene Station, Impfungen, Behandlung durch aggressive Medikamente bei Kinder gegen d. Willen Kindern / Eltern
sw24	3	1	1	1	1	2	0		1	0		2000	4	4	2	1	4	2	3	2	4	3	3	3	2	3	4
sw25	2	2	1	0	0	3	1	Krankenpflegepraktikum	1	0		1999	4	4	3	1	3	1	3	3	2	1	4	1	2	4	4	Zwangsernährung, Fesseln	/
sw26	3	3	2	0	2	5	0		1	0		1999	2	2	5	5	3	2	2	5	4	2	4	3	3	2	5
sw27	3	3	0	1	2	1	1	Pflegepraktikum	1	1		2000	3	3	4	1	3	0	2	3	3	1	2	3	2	4	5	Hinwegsetzen über die Meinung des Patienten, autoritäres Verhalten seitens Ärzte/Pfleger
sw28	2	0	2	0	1	3	0		1	1		1999	2	4	4	1	4	1	3	-99	3	1	3	1	3	4	4	Fixierung, medikamentöse Einnahme	Persönlicher Kontakt ist das wichtigste in der Behandlung von Patienten
sw29	3	2	2	2	2	3	1	Praktikum	1	0		1999	4	4	3	2	3	1	2	2	3	3	4	1	2	4	3	Zwangsernährung (Essstörung), Binden bei aggressiven Patienten	Zwang sollte gut bedacht sein, da es den Patienten in Eigenbestimmung und Würde einschränkt. Er kann in lebensbedr. Situationen allererdings hilfreich sein und twilweise vom Patienten im Nachgang als berechtigt angesehen werden (bspw. Zwangsernährung)
sw3	3	1	1	0	3	4	1	BFD im Rettungsdienst	1	0		1998	5	5	4	2	3	1	1	3	2	3	5	1	3	4	5	Zwangseinweisung, Fixierung, Zwangsernährung, Sedierung bei auffälligen Patienten	Zwang zum Eigenschutz des Patienten und des Personals, ja, aber nur wenn alle anderen Maßnahmen scheitern
sw30	4	3	1	0	2	4	0		1	0		1998	4	4	2	2	4	0	3	3	4	2	2	1	2	2	4	Zwangsernährung	/
sw31	4	5	0	0	3	1	1	Pflegepraktikum	1	0		2000	4	4	3	1	3	0	3	1	3	2	4	1	2	5	4	den Patienten mehr in den Fokus rücken & den Gedanken verlieren es ist ein reines "Wirtschaftsunternehmen"	/
sw32	3	4	0	1	3	2	1	Pflegepraktikum, Praktikum Arztpraxis	1	0		1989	4	4	3	0	5	-99	-99	-99	4	-99	5	-99	0	-99	-99
sw33	3	0	2	3	1	-99	1	Pflegepraktikum, Persönliche Pflegehelferin von Menschen mit Muskeldystrophie	1	0		1992	-99	-99	-99	-99	-99	-99	-99	-99	-99	-99	-99	-99	-99	-99	3
sw34	3	4	3	1	3	2	1	Praktikum in Arztpraxis	1	0		2000	3	3	3	1	4	3	3	2	3	3	2	2	2	1	4
sw35	3	2	1	1	1	3	1	Pflegepraktikum	1	0		1998	4	3	2	3	3	1	1	4	2	2	3	0	2	4	4
sw36	5	3	2	0	2	-99	0		1	0		2001	3	3	4	3	2	0	1	4	2	2	3	2	-99	4	5
sw37	5	4	1	0	1	2	0		1	0		-99	4	4	4	2	3	1	2	3	4	1	2	2	-99	4	2	Fixierung	/
sw38	3	2	2	0	0	4	1	Praktikum	1	0		1998	3	3	4	3	3	1	3	3	1	1	3	1	2	4	5
sw39	3	3	2	2	0	1	1	Praktika	1	1		1999	4	4	5	1	3	0	3	5	4	3	4	1	2	1	3	Zwangsernährung bei z.B. Magersucht, Fixierung bei Bedrohung des Patienten oder anderer
sw4	2	4	0	0	4	4	1	Pflegepraktikum	1	0		1999	2	3	4	3	3	1	2	5	5	1	1	-99	1	4	5
sw40	4	1	1	4	1	5	1	Rettungdienst	1	1		1990	5	5	4	1	5	2	3	4	4	0	5	1	1	1	4	PsychKG Unterbringung von Patienten wegen Fremdgefährdung oder Eigengefährdung	Patienten sollten über die Risiken aufgeklärt werden und selbst entscheiden, ob sie eine Therapie möchten oder nicht
sw41a	-99	-99	-99	1	2	-99	1	Rettungssänitäter, BFD im Bereich Wohnen mit Menschen mit geistiger Behinderung mit medizinischer Betreuung	1	0		1997	5	5	3	1	5	-99	3	1	3	1	4	4	-99	-99	5	Wenn Eltern die Behandlung ihrer Kinder verweigern und dementsprechend eingegriffen wird. Einweisung von Menschen, die Mord oder Selbstmord / Verletzung angekündigt haben -> Einweisung in LVR	Im Rettungsdienstpraktikum gab es Notärzte, die Patienten, die psychisch Hilfe brauchten, dazu überredeten, mit in die LVR zu kommen, anstatt über das PsychKG zu gehen. So können sich diese Patienten, die aber Hilfe brauchen, selber entlassen.
sw42	3	1	2	2	0	-99	0		1	0		1999	4	4	3	1	3	1	3	1	3	3	4	3	2	-99	3	Zwangsernährung, Zwangsfixierung
sw43	3	3	1	0	3	1	1	Ausbildung	1	1		1992	5	4	3	1	4	2	4	3	3	3	4	2	2	3	3	Fixierung, Zwangsernährung
sw44	3	3	1	1	1	4	1	Pflegepraktikum	1	0		2000	4	4	3	2	3	2	3	2	4	3	4	3	2	-99	3	Zwangsernährung bei Magersucht, medikamentöse Behandlung von psychogenen Erkrankungen	/
sw45	3	3	1	0	0	2	1	5 Jahre Rettungdienst	1	0		1991	3	3	-99	1	3	2	4	5	3	3	3	-99	-99	4	4	5-Punkt FixiErung, Einweisung per PsychKG, Zwangsernährung bei Anorexia nervosa
sw46	2	2	2	0	0	0	0		1	0		2000	3	3	3	1	3	1	3	3	3	0	3	2	3	3	1	/	/
sw47	3	1	0	0	0	0	1	Gesundheits- u Krankenpfleger	1	1		1992	2	3	4	0	4	0	3	4	3	0	2	2	2	3	3	morgendliche Routine (Visite), Fixierung, Behandlungsverweigerung, Zwangsernäherung	/
sw48	3	3	1	0	2	2	0		1	0		1999	4	4	3	1	3	0	1	3	3	2	4	2	3	4	4	Zwangseinweisungen
sw49	4	3	0	0	1	2	0		1	0		2000	4	2	3	2	3	1	2	3	3	0	1	0	2	3	5	Zwangseinweisung in die Psychiatrie	/
sw5	2	1	1	1	2	4	0		1	0		1999	4	4	1	3	4	2	3	2	4	3	2	3	2	1	3
sw50	3	1	1	0	0	1	0		1	0		2000	2	3	3	2	3	1	1	2	3	2	2	1	1	1	2		/
sw51	3	0	1	1	0	1	0		1	0		2000	2	3	3	2	3	1	1	2	3	2	2	1	1	2	3	"Restraints" bei aggressiven Patienten	/
sw52	3	4	4	1	2	3	0		1	2		1999	4	4	2	2	4	3	3	3	3	1	3	2	2	2	3	Gewalt, wenn man der Patient nicht informiert
sw53	3	2	1	0	1	-99	1	Pflegeheim	1	0		1998	3	4	5	0	3	0	2	3	2	1	4	0	1	1	5
sw54	1	3	1	0	1	1	1	Pflegepraktikum	1	1		1998	1	2	1	1	4	2	2	2	3	2	4	1	2	1	2
sw55	4	5	0	0	1	5	0		1	0		1999	4	3	5	5	2	2	1	4	0	2	2	3	4	3	5	Kommunikation zw Arzt und Patient
sw56	3	2	3	0	1	3	0		1	0		2000	4	3	3	1	3	1	2	3	2	3	4	2	3	2	4	Zwangsernährung bei magersüchtigen Patienten, Zwangsruhigstellung von aggressiven/gewalttätigen Patienten	/
sw57	4	3	0	2	1	2	1	Pflegepraktikum	1	1		1999	5	5	2	2	4	1	3	2	3	3	5	3	2	5	5	Fixierung bei aggressiven Patienten, Notmaßnahmen f Kinder zB bei sturen Eltern	Zwang war nicht gut definiert, schwer zu bearbeiten.
sw58	2	1	0	0	0	1	1	Pflegepraktikum	1	1		1998	1	2	5	2	2	0	1	4	2	2	2	1	2	2	3	Körper fixieren, Druck
sw59	0	2	0	0	1	5	0		1	1		2000	5	5	3	0	3	1	1	0	3	1	4	1	2	2	3	psychischer Druck, gesellschaftlicher Druck, physische Gewalt
sw6	4	3	4	0	2	3	0		1	0		1999	4	4	1	2	4	2	4	3	5	2	5	4	1	1	4	Gespräche mit den Verwandten des Kranken
sw60	3	4	1	0	2	5	1	FSJ Uni Klinik	1	1		1995	1	3	2	3	5	1	3	3	3	2	5	1	2	1	2	Fixierung, Zwangsjacke, polizeiliche Begleitung
sw61	3	3	1	1	0	4	1	Praktikum	1	0		1983	2	3	5	4	3	0	1	5	5	0	3	3	3	5	5
sw62	2	1	1	1	1	2	1	Schwesternhelferin, MTRA	1	0		1991	3	4	4	2	4	1	2	3	3	2	4	2	1	4	5	Fixierung, Therapie gegen den Willen (teilweise auch durch z.B. Unwissenheit über Patientenwillen), med. Beruhigung / Sedierung bei unkooperativen Pat.
sw63	4	2	1	1	1	4	1	Pflegepraktikum	1	0		1998	4	4	3	2	3	0	3	4	4	0	3	1	2	4	5	Fixierung von Patienten, Zwang Tabletten nehmen zu müssen	Bei manchen Patienten bedarf es Zwangsmaßnahmen um sie und ihr Umfeld zu schützen an vielen Stellen wird aber auch Zwang angewendet um Unterbesetzung oder fehlende Zeit zu Kompensieren -> das darf nicht sein!
sw64	4	3	2	0	3	2	1	Physiotherapeutin	1	0		1991	2	2	5	3	2	0	1	5	2	1	1	-99	1	3	3	Wenn Kindern zu impfen gezwungen werden - körperlich festgehalten	Fixierung von desorientierten / verwirrten Pat. ist teilweise ok, da sonst Zugänge u andere Lebensnotwendige Medikamente / Therapie nicht erfolgen können
sw65	3	4	1	0	1	4	1	Krankenpflegepraktikum	1	1		1998	5	3	4	1	4	0	4	5	4	1	3	1	3	3	5	in der Behandlung von psychisch labilen Patienten
sw66	-99	3	2	0	1	4	0		1	0		2000	3	3	3	2	2	1	3	4	3	1	4	2	2	4	5
sw67	3	1	2	0	0	2	1	angefangene Ausbildung, Pflegepraktikum	1	0		1999	3	4	4	1	3	0	0	3	3	3	4	3	3	3	4	Zwangsernährung Magersucht, Gefährdung andere & Patienten durch Bettfixierung, psychische Therapie	Etwas schwierig zu beantwortende Fragen, da z.T. sehr generalisiert
sw68	3	3	2	2	4	4	0		1	0		2000	4	4	3	3	2	2	1	3	3	2	4	-99	2	-99	-99	Festschnallen, zu Essen oder Medikamenten zwingen
sw69	2	0	1	0	1	1	0		1	0		1998	1	2	4	3	1	1	1	4	1	1	0	1	2	1	5	alte Menschen die nicht mehr leben wollen zur Einnahme von Medikamenten / Nahrungsaufnahme zwingen
sw7	4	1	0	1	2	1	0		1	0		1999	3	3	4	-99	3	2	4	2	3	3	4	3	2	3	5	Probleme mit psychisch kranken Patienten
sw70	3	2	2	1	0	3	0		1	0		2000	3	3	4	2	-99	0	1	2	2	2	2	1	2	1	3	Operationen, Impfungen, Medikamentenverabreichungen
sw71	1	2	1	0	2	-99	0		1	1		1999	4	3	4	1	-99	0	2	2	-99	-99	4	-99	3	4	4	Festhalten / binden	evtl beruhigende Medikamente, dominante/ befehlende Kommunikation
sw72	3	1	2	1	2	2	0		1	0		2000	4	4	3	1	4	2	2	2	3	3	4	2	1	2	4	Zwangsernährung, Fixierung von unruhigen Patienten, Ruhigstellung durch Medikamente	Zwang kann sinnvoll sein, wenn es um das Leben von Patienten geht, aber diese Maßnahmen sollten gut überlegt sein, wenn der Patient bei voller Orientierung ist und sich dagegen stellt.
sw73	1	2	1	0	1	4	0		1	0		1999	3	4	3	1	3	2	3	3	4	3	3	2	3	5	5	Gewahrsam ohne Einverständnis des Patienten, Verabreichung von Medikamenten ohne Einverständnis	/
sw74	3	1	1	0	0	3	1	Pflegepraktikum	1	1		1996	4	4	3	2	3	1	2	2	3	2	4	2	2	2	3	konkretes Eingehen auf das für den Patienten spezifische Setting, bzw auf dessen Lebensumstände	Zwang kann durchaus berechtigt sein, wenn er zum Schutz des Patienten vor sich selbst und zum Schutz andere dient, spööte aber nur als letzte Möglichkeit und möglichst begrenzt genutzt werden.
sw75	3	4	1	0	1	3	1	Stationspraktika	1	0		1998	5	5	3	-99	4	2	3	2	4	2	5	3	2	1	2	Unter gewissen Umständen muss man Patienten mit Zwang zur Tabletteneinnahme oder zu Untersuchungen bewegen. Dies geschieht jedoch i.d.R. im Sinne der Patienten
sw76	3	5	2	1	0	3	0		1	1		2000	4	4	5	1	3	1	3	3	4	2	2	0	1	1	3	Fixierung, Zwangseinweisungen, geschlossene Psychiatrie
sw8	4	5	1	2	3	5	0		1	0		1999	3	3	2	3	3	1	3	2	3	2	3	3	2	3	4
sw9	4	2	3	1	1	2	0		1	0		1999	3	4	2	2	3	2	4	2	5	2	5	1	1	2	5	Zwang Arzneimittel zu sich zu nehmen

## Sheet: Codebook
Variable	Label	Values
	to what extent do you agree with the following statements?	5 I fully agree 4 I Agree 3 I somewhat agrre 2 I somewhat disagree 1 I disagree 0 I fully disagree
v1.1	The most important part of the medical visit is the physical examination
v1.2	Patients should rely on the knowledge of their doctors and not try to inform themselves about their condition.
v1.3	When doctors ask many questions about a patient's personal situation, they interfere too much in private matters.
v1.4	If doctors are really good at diagnostics and therapy, their interaction with patients is not as important.
v1.5	When patients have a different opinion than their doctors, it shows that they do not respect and trust their doctors.
v1.6	The patient must always be aware that the doctor is in charge.
v2	have you already gained experience in the medical field? e.g. federal voluntary service, civilian service, FSJ, training or similar.	0 No 1 Yes, namely: ______________________(v2b)
v3	In which degree program are you enrolled?	1 Human Medicine 2 Dentistry 3 Speech therapy 4 Doctoral studies
v4	Please specify your gender:	0 Female 1 Male 2 Other, namely: ____________________ (v4b)
v5	in which year were you born?	open text response format
	coercive measures in medicine are a special challenge for the relationship between doctor and patient. To what extent do you agree with the following statements?	5 fully agree 4 agree 3 rahter agrre 2 rather disagree 1 disagree 0 fully disagree
v6.1	Use of coercion is necessary as protection in dangerous situations.
v6.2	For security reasons coercion must sometimes be used.
v6.3	Use of coercion can harm the therapeutic relationship.
v6.4	Use of coercion is a declaration of failure on the part of the mental health services.
v6.5	Coercion may represent care and protection.
v6.6	More coercion should be used in treatment.
v6.7	Coercion may prevent the development of a dangerous situation
v6.8	Coercion violates the patients integrity.
v6.9	For severely ill patients coercion may represent safety.
v6.10	Patients without insight require use of coercion.
v6.11	Use of coercion is necessary towards dangerous and aggressive patients.
v6.12	Regressive patients require use of coercion.
v6.13	To much coercion is used in treatment.
v6.14	Scarce resources lead to more use of coercion.
v6.15	Coercion could have been much reduced, giving more time and personal contact.
v7	what measures come to mind when you think of the topic of "coercion in medicine"?	open text response format
v8	Are there any other things you would like to tell us about this topic?	open text response format
